# Supplementary material for: Conditioned Medium of Human Amniotic Epithelial Cells Alleviates Experimental Allergic Conjunctivitis Mainly by IL-1ra and IL-10
Source: Front Immunol. 2021 Nov 22;12:774601. doi: 10.3389/fimmu.2021.774601 (PMC8645696; doi:10.3389/fimmu.2021.774601)
Supplement: Supplementary file 2 [file DataSheet_2.xlsx]

## Sheet: Supplemental Table1 1
proteinID	HEFCM	AECM	AMSCM	BMSCM	UMSCM	ADSCM
	Normalized flurescent signal intensity
6Ckine	113.482	1769	237.619	375.971	1211.61	225.339
Activin A	1456	20269.5	53017.3	65584.2	78220.5	26601.2
Activin B	1.04112	402	53.9315	194.717	307.032	275.628
Activin C	158.25	954.25	778.269	2976.85	645.784	628.944
Activin RIA	115.564	629	115.339	294.195	360.395	345.918
Activin RIB	67.4122	897.5	519.024	1429.34	751.194	735.182
Activin RII A/B	3.6439	526.5	125.751	252.309	170.866	264.697
Activin RIIA	1.04112	1322.5	90.3446	223.887	109.354	101.094
Adiponectin	8.84948	30342.5	620.118	1070.57	17351.5	10410.3
AgRP	512.229	1935	993.728	945.91	903.484	754.475
ALCAM	4.9453	1092.75	791.084	1091.51	670.844	643.668
Angiogenin	49.453	1267.25	882.127	1024.2	837.767	648.491
Angiopoietin-1	64.5491	2816	631.159	4983.11	365.652	538.654
Angiopoietin-2	1454.7	2053.5	2631.29	2492.68	2724.39	1701.88
Angiopoietin-4	1.04112	238.3	212.522	297.685	260.504	169.004
Angiopoietin-like 1	867.77	4779.75	1632.9	2576.94	2439.96	1742.01
Angiopoietin-like 2	109.577	389.5	2789.75	5208.74	271.282	3640.41
Angiopoietin-like Factor	1.00411	6.5	1.06795	8.99727	86.2214	17.7493
Angiostatin	595.258	18688.2	1153.12	1759.18	3251.22	1714.74
APJ	259.238	590	1254.04	2767.92	806.134	1041.87
APRIL	67.4122	6399.25	228.541	548.249	613.802	359.36
AR (Amphiregulin)	5.46585	315	166.066	216.408	661.03	224.31
Artemin	262.882	1024.75	307.837	321.121	405.871	319.231
Axl	1.00411	1381.75	347.084	774.629	210.033	200.645
B7-1 /CD80	46.0693	1233	100.068	100.724	236.583	100.029
BAFF R / TNFRSF13C	11.4523	1372.75	207.182	100.995	238.16	100.029
BCMA / TNFRSF17	1.00411	1228	251.502	256.298	565.696	423.281
BD-1	1928.67	5266	2558.81	3246.11	4778.98	2482.08
BDNF	6.24669	6376	1490.59	1546.46	923.988	974.986
beta-Catenin	3.12335	443.75	53.1305	151.834	233.691	100.029
Bax	383.651	6478.75	741.692	1105.97	1697.09	1096.4
beta-NGF	5.20558	1223.25	260.046	430.821	240	309.456
BIK	261.32	1468	862.904	3536.07	311.238	1930.82
BLC / BCA-1 / CXCL13	91.0976	288	200.241	94.9899	89.9016	194.728
BMP-2	115.043	208.75	325.725	447.525	230.011	318.459
BMP-3	1219.67	4094	3427.85	9623.9	4392.64	6710.79
BMP-3b / GDF-10	3.38362	1056	101.722	147.596	251.041	258.135
BMP-4	626.751	2066.25	965.694	952.891	637.723	1158.85
BMP-5	473.707	1481.75	737.42	788.342	747.865	712.673
BMP-6	200.675	1768.75	716.061	1348.56	729.639	793.061
BMP-7	524.201	2193.25	905.355	935.688	902.696	845.664
BMP-8	329.513	1236.25	689.629	832.72	874.832	875.119
BMP-15	867.77	3573.75	1301.56	1558.48	1752.55	999.364
BMPR-IA / ALK-3	13.2742	351.75	105.727	196.213	201.884	124.695
BMPR-IB / ALK-6	1.04112	8667.75	122.814	209.427	458.445	213.376
BMPR-II	53.8777	387.75	63.0091	166.045	327.273	76.3993
BTC	319.622	1070	434.656	467.221	1045.19	489.264
Cardiotrophin-1 / CT-1	1.00411	1247	126.552	298.682	171.391	215.564
CCL14 / HCC-1 / HCC-3	283.183	1640	338.006	338.822	692.663	574.472
CCL28/ VIC	490.626	1053	2482.45	19583.6	626.682	14878.3
CCR1	49.453	101.5	130.023	116.182	144.579	196.464
CCR2	82.7687	458.5	189.294	80.7788	104.097	184.439
CCR3	293.334	1032.5	355.628	257.794	385.63	351.385
CCR4	315.978	588	744.095	1462.5	225.543	569.008
CCR5	41.9049	566.5	475.238	573.43	446.353	445.661
CCR6	1.04112	548	373.249	271.756	10.6802	17.2026
CCR7	157.729	19025	440.263	1144.37	1285.96	507.528
CCR8	13.5345	2164.25	486.985	565.203	638.577	679.619
CCR9	1.04112	7405	123.572	406.138	521.271	127.589
CD14	8.06864	704.25	375.385	1551.75	230.8	403.862
CD27 / TNFRSF7	3.38362	632	159.271	150.611	248.675	100.029
CD30 / TNFRSF8	811.029	2488.5	1680.42	3186.78	1176.87	1658.66
CD30 Ligand / TNFSF8	65.5903	501.5	432.52	1084.03	320.876	312.8
CD40 / TNFRSF5	1111.91	1578.75	2904.83	10676.8	1018.23	2964.91
CD40 Ligand /CD154	188.962	8930.5	1824.59	3637.04	5685.35	1380.85
CD 163	172.565	932.75	374.851	340.318	376.167	552.544
Cerberus 1	81.9878	218.5	177.96	189.754	102.256	129.839
Chem R23	144.975	330	214.124	185.492	213.188	142.509
Chordin-Like 1	90.577	430.5	274.73	2657.72	195.312	1566.57
Chordin-Like 2	335.499	5404	689.896	888.069	1561.62	604.763
CLC	237.374	1070.5	962.49	1270.77	534.678	800.521
CNTF	1056.21	22753.5	3098.26	3686.64	3500.68	3859.7
CNTF R alpha	720.972	4432	1322.66	1722.28	1511.5	1416.35
Coagulation Factor III	113.221	1275.75	266.187	316.633	466.857	199.036
CRIM 1	231.128	1056	3344.55	1682.89	1186.07	974.022
Cripto-1	1.04112	609	176.212	370.236	403.768	320.517
CRTH-2	260.799	1489	422.107	401.9	579.629	363.475
Cryptic	395.884	2584.75	600.722	778.868	1035.18	580.326
Csk	1093.95	347	1438.53	1158.83	530.998	1269.72
CTACK / CCL27	806.864	19486.8	2582.04	4752.99	2660.25	4023.7
CTGF / CCN2	162.674	490.5	472.034	766.402	369.705	1720.66
CTLA-4 /CD152	664.231	1767.5	1136.57	1919.49	1058.42	1324.77
CV-2 / Crossveinless-2	690.78	2214	7286.63	2841.47	1559.87	1470.88
CXCL14 / BRAK	203.017	5998.75	409.852	400.404	1010.23	415.757
CXCL16	78.8645	2172.25	545.99	5906.83	458.971	691.706
CXCR1 / IL-8 RA	252.991	9817.5	1008.15	882.085	770.472	672.993
CXCR2 / IL-8 RB	111.139	10179	232.279	415.114	1495.44	363.218
CXCR3	66.8917	297	109.465	223.388	278.117	278.845
CXCR4 (fusin)	856.838	512.25	2907.5	11956.3	619.387	5167.11
CXCR5 /BLR-1	148.619	817	529.436	1235.37	557.087	759.363
CXCR6	80.4261	476.25	395.142	464.728	412.18	456.273
D6	308.691	559.5	426.379	696.593	777.833	768.88
DAN	53.0969	147.75	154.586	202.719	203.461	147.911
DANCE	120.249	409	267.522	303.669	186.638	352.414
DcR3 / TNFRSF6B	121.81	642.5	393.953	615.814	311.764	415.437
Decorin	135.866	1298.5	26706.2	22927	953.714	34820.6
Dkk-1	3467.17	2698	99629.6	13047.8	2056.96	7064.23
Dkk-3	137.948	285.5	159.659	267.518	275.488	470.743
Dkk-4	648.875	2576.5	1604.33	2353.31	1095.91	1630.11
DR3 / TNFRSF25	382.089	573.5	600.455	576.921	516.54	459.617
DR6 / TNFRSF21	96.8237	2519.75	529.436	189.731	734.985	200.029
Dtk	1.04112	608	211.721	303.419	152.465	192.413
EDA-A2	38775	33498.5	116268	154651	74448.2	119052
EDAR	57.2613	1219.25	88.1059	210.923	286.791	100.029
EDG-1	814.933	5178.25	2304.1	3607.12	1497.83	3058.8
EGF	341.226	2414	542.786	1053.12	472.115	819.556
EGF R / ErbB1	50.2338	5368	365.773	826.986	882.718	482.124
EG-VEGF / PK1	12.2331	484.75	253.785	254.601	607.032	401.931
EMAP-II	409.679	3321.25	1275.93	2590.16	4353.13	1830.87
ENA-78	49.1927	415.25	206.648	474.202	218.708	341.096
Endocan	979.689	1102.5	959.554	4206.23	2049.86	428.042
Endoglin / CD105	442.474	1415.75	736.352	871.364	859.585	535.052
Endostatin	300.882	1117.5	926.981	561.214	928.194	460.131
Endothelin	352.678	1645.75	702.177	750.445	689.771	539.425
EN-RAGE	144.455	1814	37.3783	274.795	323.33	210.029
Eotaxin/ CCL11	7.02753	457.25	442.132	545.507	154.568	179.037
Eotaxin-2/ MPIF-2	1.04112	1067	206.381	434.56	401.665	484.504
Eotaxin-3/ CCL26	1.00411	377	30.9706	152.084	201.096	157.878
Epiregulin	88.4948	1676.75	478.976	907.017	340.154	779.427
ErbB2	1.20041	1072	158.737	230.868	311.764	198.779
ErbB3	1.01041	1283	179.295	110.448	275.488	200.064
ErbB4	62.4669	313.5	47.2568	68.313	71.7635	21.8651
Erythropoietin	2665.63	20713.2	2988.39	2712.32	2464.67	3449.03
E-Selectin	238.415	2028.25	634.363	933.444	414.283	726.436
FADD	40.3432	1435	300.094	368.491	378.533	369.906
FAM3B	2721.48	2484.5	4087.31	3947.94	793.342	3989.23
Fas / TNFRSF6	116.345	769	203.979	291.203	218.445	240.116
Fas Ligand	112.44	618	248.832	361.012	341.994	336.658
FGF Basic	109.785	1245	449.099	532.34	695.357	607.655
FGF-BP	177.54	460.5	406.355	696.094	380.412	535.052
FGF R3	155.073	594	265.386	413.618	215.137	391.384
FGF R4	57.2613	18472.5	362.449	535.783	639.3	670.421
FGF R5	292.814	3451.75	2271.53	2880.36	1155.05	1237.43
FGF-4	57.2613	873.5	263.009	407.883	303.352	425.854
FGF-5	62.9345	1319.75	801.497	1547.76	594.612	1122.07
FGF-6	27.8498	854.5	379.95	301.448	583.265	412.67
FGF-7 / KGF	204.319	824.5	1670.01	12411.3	1624.27	4879.27
FGF-8	86.3596	817	473.929	547.525	422.016	557.11
FGF-9	52.0558	3630.25	307.863	330.907	391.676	432.991
FGF-10 / KGF-2	163.036	2578	1013.75	1857.91	664.536	1601.04
FGF-11	484.789	4785.75	6273.68	6313.47	1108.79	6853.81
FGF-12	240.912	2573.75	871.448	868.871	770.735	823.477
FGF-13 1B	397.027	6621	1159.26	1273.01	1758.34	1086.05
FGF-16	638.984	2031.5	1828.33	2399.18	1006.11	1641.17
FGF-17	358.245	2051.25	751.303	753.936	636.671	664.957
FGF-18	842.262	2752	996.398	1062.34	1314.09	898.528
FGF-19	555.435	2655.75	876.253	1163.32	1251.26	1295.89
FGF-20	481.255	409.25	604.46	939.428	605.39	973.381
FGF-21	27.3293	2027.25	118.009	247.822	323.856	316.785
FGF-23	312.595	1000.75	815.113	1168.8	909.53	709.973
FLRG	7.28781	590	195.969	137.623	276.014	197.558
Flt-3 Ligand	486.982	1836.75	900.282	974.083	1316.45	940.715
Follistatin	2130.64	20767	6581.51	8278.34	3280.62	8609.45
Follistatin-like 1	2496.85	9932.25	7691.38	10767	1280.35	15028
Fractalkine	70.5356	255.75	138.567	133.907	169.288	156.849
Frizzled-1	822.481	1270.5	1329.6	1388.2	1378.49	890.039
Frizzled-3	618.943	1058.75	955.549	631.77	791.239	686.949
Frizzled-4	1346.17	632.5	367.909	150.089	422.695	286.819
Frizzled-5	112.961	1183.5	643.173	345.055	379.322	316.658
Frizzled-6	68.4533	1050.75	372.715	154.577	477.635	172.863
Frizzled-7	145.236	1014.5	348.686	183.771	240.263	186.239
Galectin-3	407.076	4780	3197.98	14083.9	1844.03	4580.87
GASP-1 / WFIKKNRP	1545.02	10964.5	2006.15	1739.99	1598.25	1085.8
GASP-2 / WFIKKN	1741.79	1769.5	935.792	840.449	1091.96	715.89
GCP-2 / CXCL6	47.631	663.75	155.387	119.174	352.509	199.551
GCSF	654.063	4731.75	4341.75	4172.58	3432.03	3045.42
G-CSF R / CD 114	166.058	1426.75	503.539	1085.28	453.714	744.186
GDF1	1845.38	1817	3015.36	2569.71	2388.17	2421.63
GDF3	4037.97	3557	5654.8	5599.42	4528.73	4746.02
GDF5	4063.47	3974.5	6863.45	7700.17	4959.31	5938.57
GDF8	2437.25	2077.5	3381.67	3100.26	3067.17	2540.98
GDF9	3649.11	3400.5	5172.08	5382.76	4055.56	4839.39
GDF11	2966.14	3024	3998.67	3752.98	3668.61	3421.76
GDF-15	60.4941	8499.75	1489.79	1049.88	3526.14	1468.17
GDNF	142.373	896	621.547	456.251	696.343	555.179
GFR alpha-1	53.6174	648.25	612.47	153.829	209.77	249.005
GFR alpha-2	251.429	833.5	459.486	559.468	596.715	575.438
GFR alpha-3	831.07	1929	1327.46	1927.22	1338.27	1271.52
GFR alpha-4	2741.31	2774	2882.4	3801.59	2658.14	2297.64
GITR / TNFRF18	1289.58	1142	940.33	1207.19	861.688	1042.84
GITR Ligand / TNFSF18	919.825	2661.25	1682.02	1660.45	1854.81	1052.36
Glucagon	375.062	18624	832.734	938.181	1190.8	839.363
Glut1	701.712	1605.5	1001.74	825.739	1046.75	793.832
Glut2	1826.07	9548	1178.75	1416.12	1882.15	1192.55
Glut3	1484.74	3826	1296.76	1928.97	974.722	1733.52
Glut5	1456	7663.75	2144.18	2522.1	2328.24	1736.86
Glypican 3	12555.1	3163.5	12178.1	11634.6	753.386	13485.4
Glypican 5	201.196	4617	6437.61	4926.76	664.798	6555.42
GM-CSF	1053.34	3600	3130.16	3157.36	2373.72	2597.83
GM-CSF R alpha	328.573	1546	1148.05	906.02	909.005	789.974
Granzyme A	3080.66	2434	5167.28	6825.06	3304.8	4414.95
GREMLIN	11024.1	12438.2	16117	23919.5	9329.78	23260.9
GRO	2792.27	4316.5	6549.21	4921.03	4036.9	3714.75
GRO-a	230.086	2031	1285.01	2829.25	1066.22	2230.24
Growth Hormone	70.015	1047	1293.82	2227.4	1058.34	1529.53
Growth Hormone R	654.341	8801.75	2179.42	2495.17	5878.3	2526.32
HB-EGF	210.773	6238.5	660.26	1306.92	618.533	633.574
HCC-4/ CCL16	194.168	314	256.842	158.317	262.344	228.426
HCR / CRAM-A/B	1428.41	2032.5	2191.97	3954.42	1783.31	2458.93
Hepassocin	1901.08	2121	2938.2	4929.01	1420.02	2868.19
GLO-1	641.067	5829.5	2881.33	8817.61	11905.6	2420.34
HGF	141.486	426.5	628.489	575.923	572.005	597.173
HGFR	3266.5	2923.75	4997.47	4645.28	3874.44	3561.7
HRG-alpha	149463	177017	152566	165090	151805	143524
HRG-beta1	21.3429	1511.75	287.813	256.797	236.583	210.029
HVEM / TNFRSF14	181.935	964	638.634	410.875	324.907	285.018
I-309	1.00411	665	112.135	64.5732	450.034	171.834
ICAM-1	50.2485	502	296.356	521.572	366.967	405.405
ICAM-2	5.98641	2266.5	147.911	191.476	519.431	57.2349
ICAM-3 (CD50)	52.0558	298.75	173.008	225.882	256.298	296.721
ICAM-5	318.268	5356	892.566	722.771	1079.08	976.79
IFN-alpha / beta R1	481.569	981.5	406.355	304.666	496.036	482.062
IFN-alpha / beta R2	246.744	1042.5	278.735	165.297	610.121	412.735
IFN-beta	309.211	600.25	332.133	529.052	486.31	357.559
IFN-gamma	2618.4	3072.5	4143.11	4294.24	2984.1	3218.03
IFN-gamma R1	282.976	514.25	437.86	437.303	316.233	382.703
IGFBP-1	234.511	663.5	888.535	2816.29	365.871	1190.49
IGFBP-2	180.113	3538.5	305.434	2867.9	425.324	495.243
IGFBP-3	321.444	5411.25	1366.44	4641.79	579.366	2924.01
IGFBP-4	1608.42	1826	1869.45	2403.42	1360.09	1547.02
IGFBP-6	222.018	946.5	1000.4	371.982	505.762	3167.36
IGFBP-rp1 / IGFBP-7	15363.2	8498.5	145911	233590	80248	96094.4
IGF-I	92.9195	511.5	245.896	303.17	427.164	406.047
IGF-I SR	212.18	662.75	222.668	259.29	379.059	211.191
IGF-II	302.444	10169	542.519	646.231	1189.22	882.576
IGF-II R	719.15	1941.5	1394.74	1948.42	1120.88	1268.69
IL-1 alpha	3363.84	3673.25	4722.21	4383.5	3568.2	4723.64
IL-1 beta	179.592	550	150.848	233.907	378.533	308.297
IL-1 F5 / FIL1delta	462.776	1350.25	761.983	941.921	771.787	988.046
IL-1 F6 / FIL1 epsilon	254.813	421.5	539.849	1153.09	361.709	543.798
IL-1 F7 / FIL1 zeta	101.769	483.75	256.842	557.723	175.071	283.475
IL-1 F8 / FIL1 eta	454.967	858	503.806	1067.33	236.32	526.821
IL-1 F9 / IL-1 H1	140.07	1892.25	2880.26	2238.37	570.428	600.905
IL-1 F10 / IL-1HY2	1492.54	3936	1342.41	1332.85	1761.23	1293.64
IL-1 R3 / IL-1 R AcP	10.0411	2685.25	1201.98	886.822	477.372	529.136
IL-1 R4 / ST2	218.947	1400	2193.3	1317.89	605.127	598.332
IL-1 R6 / IL-1 Rrp2	1283.65	1227.5	1214.53	1590.65	1318.82	1023.54
IL-1 R8	349.815	665.5	793.754	925.716	574.634	510.615
IL-1 R9	103.07	1505	207.449	250.065	254.984	316.401
IL-1 ra	127.537	10948.5	267.668	460.287	747.865	420.709
IL-1 sRI	971.881	1236	1252.71	1244.09	1407.93	1111.01
IL-1 sRII	348.774	630	375.919	367.743	498.402	359.874
IL-2	3438.28	3063	5164.61	5196.77	3452.8	5134.44
IL-2 R alpha	324.828	1417.5	665.333	950.647	893.495	564.892
IL-2 R beta/CD122	613.79	8157.5	796.157	907.515	1463.13	876.92
IL-2 R gamma	562.255	914	657.057	805.545	698.709	532.48
IL-3	92.3579	304.25	386.064	237.6	197.678	207.01
IL-3 R alpha	99.6868	863.5	223.736	243.832	252.881	273.378
IL-4	95.7826	1835.5	717.129	598.362	433.998	295.822
IL-4 R	59.3436	4702.75	306.502	311.148	621.951	317.43
IL-5	3303.26	2831.75	4019.23	4271.56	3190.98	3672.83
IL-5 R alpha	363.87	3568.75	907.491	1119.44	931.086	1077.56
IL-6	2400.29	3783.75	5593.66	4089.3	2955.97	2946.39
IL-6 R	158.77	2023.5	259.779	376.469	644.295	171.32
IL-7	3036.41	2924.5	3818.19	4182.05	3838.43	3357.2
IL-7 R alpha	129.879	3835.5	210.386	216.657	960.002	196.786
IL-8	2206.12	2546	3129.63	2995.8	2968.85	2650.82
IL-9	1552.56	3250	1904.96	1707.58	2007.28	1746.89
IL-10	633.404	5318.75	2423.98	2715.57	2235.97	2071.78
IL-10 R alpha	602.545	2428.25	988.388	1139.38	966.836	756.276
IL-10 R beta	610.874	2830.5	791.885	764.906	970.516	581.869
IL-11	575.993	2784.5	1733.02	1468.48	1631.11	1409.4
IL-12 p40	124.934	1393	258.444	387.938	304.404	388.362
IL-12 p70	1360.22	1932.5	6189.57	7728.34	952.509	3919.52
IL-12 R beta 1	229.826	1438.5	463.491	508.857	706.332	611.579
IL-12 R beta 2	3948.95	1969	5275.14	6800.63	426.901	6430.4
IL-13	1170.71	8401	6500.88	10065.4	5195.89	7038
IL-13 R alpha 1	684.533	2872.25	1342.41	1470.72	1274.92	1230.88
IL-13 R alpha 2	99.9471	473	211.454	207.931	226.331	251.835
IL-15	2484.1	2954.5	2876.52	3095.03	2975.95	2625.87
IL-15 R alpha	154.866	323.75	1347.75	993.031	344.886	556.66
IL-16	151.222	722.5	225.872	198.457	227.12	307.912
IL-17	598.535	1694	1125.62	1034.92	1629.01	1014.54
IL-17B	177.51	647.25	999.869	660.691	348.04	926.824
IL-17B R	693.643	1060	798.293	761.914	867.997	744.443
IL-17C	209.785	3586.5	404.219	1041.15	343.045	413.379
IL-17D	934.661	1294.75	1030.31	1097	1259.67	985.731
IL-17E	203.017	678.5	246.163	317.63	260.767	240.002
IL-17F	151.222	2103.5	417.569	150.089	395.357	74.3414
IL-17R	319.102	1764.5	640.77	1091.01	479.212	575.438
IL-17RC	2495.29	5252	3639.84	3863.92	1656.61	4375.85
IL-17RD	524.201	2411.25	2256.85	2282.25	4562.42	1448.5
IL-18 Bpa	194.689	1071.75	240.823	233.112	405.609	259.295
IL-18 R alpha /IL-1 R5	107.755	1060.5	1344.02	7077.87	379.059	1501.23
IL-18 R beta/AcPL	202.237	1986.25	314.778	438.799	483.681	410.807
IL-19	303.485	1217.5	971.301	3946.69	558.401	2101.62
IL-20	112.961	1021.5	200.775	501.627	518.906	502.895
IL-20 R alpha	697.287	2839	8678.17	16237.8	1485.22	5542.68
IL-20 R beta	369.075	4944.5	584.703	811.279	5302.88	487.978
IL-21	3433.08	3519.5	6451.76	6325.18	4041.36	4538.17
IL-21 R	118.687	912.75	43.252	228.375	229.748	10.0289
IL-22	133.263	983	183.421	184.994	248.149	206.239
IL-22 BP	188.962	346.25	247.765	284.721	139.321	241.031
IL-22 R	305.62	1086.5	1597.39	4882.88	885.346	2034.48
IL-23	249.087	1731.5	366.841	296.189	428.478	470.613
IL-23 R	258.977	542.75	390.336	647.727	456.868	548.686
IL-24	327.431	780.53	318.783	388.437	371.173	541.74
IL-26	378.185	1362.25	13347.2	21215.9	488.413	8704.89
IL-27	1130.39	3690.5	1866.78	2510.13	1370.6	2012.36
IL-28A	203.798	634.75	382.86	493.649	299.409	377.109
IL-29	190.524	2965.25	348.686	933.694	695.028	372.993
IL-31	117.646	1552.5	206.114	341.565	259.453	202.702
IL-31 RA	168.921	2040.5	164.998	359.516	341.994	236.658
BACE-1	273.032	1020	562.81	907.515	388.522	576.725
FACX	397.706	1407.75	548.126	548.498	729.99	478.91
Insulin	50.4941	298.5	323.856	269.761	228.281	220.13
Insulin R	5311.77	4218.75	8339.09	9892.17	5087.32	8553.38
Insulysin / IDE	373.76	2651.5	599.654	1660.7	868.523	681.163
IP-10	1.04112	10	17.4757	12.4959	147.996	16.4309
I-TAC / CXCL11	385.473	14531.5	744.095	1522.83	1273.08	1188.43
Kininostatin / kininogen	325.088	4710	418.637	642.491	1686.05	674.472
Kremen-1	1161.36	1409	1886.53	1412.38	1424.76	1770.82
Kremen-2	893.797	3282.5	969.699	784.353	1113.52	940.972
Latent TGF-beta bp1	494.269	3117.5	1207.59	8833.32	2083.51	921.422
LBP	555.435	3682.5	897.612	1405.9	2266.2	727.208
Lck	1930.23	2100.75	2076.63	2357.05	2010.17	2219.95
LECT2	46.5899	87.5	10.068	45.8744	52.574	53.7625
Lefty - A	137.687	10906.8	421.84	444.058	612.75	624.118
Leptin (OB)	185.058	1769.25	479.777	338.074	416.649	444.375
Leptin R	374.801	1042	720.6	535.035	547.295	524.506
LFA-1 alpha	483.598	2151.5	662.663	744.711	974.722	780.84
LIF	200.309	2075	647.712	649.27	619.322	680.518
LIF R alpha	23.6854	529.25	272.861	419.103	382.739	471.515
LIGHT / TNFSF14	263.142	2707.75	1134.43	1417.62	860.111	1204.38
Lipocalin-1	460.693	12901	646.377	730.999	1001.01	593.188
Lipocalin-2	659.286	8309	2336.94	2389.71	702.652	4634.89
LRP-1	1558.55	1598.5	2752.11	2480.46	435.839	2629.22
LRP-6	3207.94	2338.75	4764.93	5163.86	602.498	4567.49
L-Selectin (CD62L)	1279.79	1771.25	1796.83	1826.5	1667.91	1631.14
Lymphotactin/ XCL1	207.442	419.25	546.257	720.029	310.187	298.137
TNFSF3	219.155	622.5	252.57	444.284	239.475	292.735
TNFRSF3	239.977	751.75	476.039	739.974	337.525	445.534
MAC-1	1083.8	3077	1504.48	1719.29	1466.82	1357.95
MCP-1	2478.37	2047.75	6154.6	5163.86	5519.22	3307.55
MCP-2	609.313	1260.5	1179.02	2552.76	809.64	1541.88
MCP-3	367.514	1001.5	1644.11	911.006	648.763	496.724
MCP-4 / CCL13	452.365	1531	391.404	489.41	407.974	310.227
M-CSF	162.414	16261	406.889	519.079	950.012	486.435
M-CSF R	448.46	2597.5	1110.67	1332.35	866.683	979.3
MDC	109.838	5889.25	222.28	430.821	598.555	291.127
MFG-E8	306.088	851.5	196.77	351.288	450.296	477.688
MFRP	906.551	1480	1150.72	1028.93	1248.9	1004.77
MICA	326.39	1229.75	444	577.918	576.737	403.347
MIF	369.596	2110.5	1190.76	2547.53	1549.36	866.116
MIG	2321.17	4192	4727.28	5216.22	3077.68	3229.86
MIP-1a	349.034	10777.5	505.141	742.717	973.145	695.952
MIP-1b	1976.3	2633.75	2036.05	2289.73	1987.03	2308.96
MIP-1d	271.731	945	386.598	438.799	348.829	376.08
MIP 2	3076.76	6555.25	34490	11065.7	7691.32	5602.87
MIP-3 alpha	307.65	3087.25	462.156	819.756	631.94	563.863
MIP-3 beta	3082.74	3324.25	2691.77	2852.94	2708.61	2497.77
MMP-1	2570.77	616.5	2744.37	3116.47	1695.51	1530.04
MMP-2	971.881	3826.5	1845.42	2529.57	1576.69	1696.73
MMP-3	1817.79	1729.25	806.57	733.741	973.671	884.122
MMP-7	242.58	983.5	632.494	958.376	289.157	1115.89
MMP-8	2300.6	15126	6971.05	8317.98	3769.03	7550.41
MMP-9	495.311	16689.8	544.655	712.549	1203.94	1751.27
MMP-10	862.564	1078	2237.49	2530.06	1014.15	1308.82
MMP-11 /Stromelysin-3	689.999	1025	1199.31	1338.83	1095.38	1059.17
MMP-12	498.227	1261.25	900.282	1864.89	599.344	816.212
MMP-13	362.829	3580.75	678.149	872.611	919.782	858.91
MMP-14	528.626	2821.5	1173.14	2015.98	691.348	1673.07
MMP-15	286.046	1467.5	407.423	525.561	522.849	422.897
MMP-16 / MT3-MMP	721.753	3862.75	1126.95	1762.92	1298.84	981.485
MMP-19	1557.77	3178.25	1664.4	2388.71	1430.8	1875
MMP-20	9067.07	11011	8106.81	10454.6	9507.79	6712.08
MMP-24 / MT5-MMP	740.233	1379	927.248	1056.61	1108.26	618.911
MMP-25 / MT6-MMP	273.553	757.5	309.172	391.179	306.244	321.481
MSP alpha Chain	880.263	2144.75	1768.53	1494.16	1472.34	1263.55
Musk	3530.16	5836.75	5155.53	4734.79	4426.21	4414.7
NAP-2	299.321	2859	444.534	609.83	4369.43	460.711
NCAM-1 / CD56	907.332	5248.5	2473.91	3077.82	1119.3	1717.83
Neuritin	313.998	2517.5	1048.99	1510.61	940.023	916.02
NeuroD1	173.866	2981.25	202.11	399.905	258.664	294.471
Neuropilin-2	203.538	913.5	546.791	1564.72	300.723	575.566
Neurturin	261.84	1561	537.179	1124.92	345.674	595.76
NGF R	669.177	2050.5	1376.05	1391.19	809.64	916.277
Nidgen-1	468.502	1699	5964.5	2908.79	829.355	3345.36
NOV / CCN3	1179.06	1417.75	1348.82	2938.46	1080.4	2234.61
NrCAM	610.094	19660.8	1053.03	1554.99	1677.11	1258.98
NRG1 Isoform GGF2	382.61	3181.5	364.705	471.709	752.86	271.642
NRG2	3617.88	5523.5	5175.82	5157.38	3764.83	4790.26
NRG3	4651.18	7729.5	6015.77	5648.54	5205.88	5770.33
NT-3	377.404	4152	466.961	572.682	815.686	1001.1
NT-4	312.074	2258.25	535.577	862.14	842.236	908.045
Orexin A	206.661	523	236.818	397.911	363.812	276.787
Orexin B	984.895	1975.5	2076.63	3261.82	1260.2	1716.28
OSM	257.31	26827.8	683.488	1477.46	2703.62	1756.53
Osteoactivin / GPNMB	308.43	5828	278.201	321.121	496.299	219.68
Osteocrin	742.836	3359	1293.82	1018.21	1217.09	937.37
TNFRSF11B	1202.07	844.5	666.134	3690.4	797.285	1360.52
OX40 Ligand / TNFSF4	378.966	1504.25	399.414	758.424	396.408	539.683
PARC / CCL18	1726.43	5451.5	2808.98	4482.73	2239.13	3544.72
PD-ECGF	445.337	2394	772.929	1020.46	828.041	771.196
PDGF R alpha	2189.73	4857.25	2765.99	2878.62	2431.02	2087.73
PDGF R beta	1622.06	2612.75	2036.05	2359.04	1728.11	1611.33
PDGF-AA	473.187	6119.5	1096.25	2148.87	915.314	473.058
PDGF-AB	385.993	4273.25	1320.25	1334.6	921.097	1192.03
PDGF-BB	249.868	2189.25	290.483	366.995	504.185	466.497
PDGF-C	441.433	2680	512.616	988.793	749.968	705.343
PDGF-D	179.592	2093	302.764	384.447	282.322	315.757
PECAM-1 /CD31	312.855	1344	400.748	530.547	557.285	404.503
Pentraxin3 / TSG-14	463.817	3580.5	12347.1	3998.8	5131.75	9716.6
Persephin	651.478	6574.5	1107.46	1131.15	1249.16	984.188
PF4/ CXCL4	1250.38	6491	1315.18	1483.44	1203.94	1497.63
PlGF	1449.49	1427	612.737	1118.94	553.342	636.404
PLUNC	596.299	2539	698.707	1085.78	889.289	560.261
Pref-1	390.418	591.25	562.81	705.568	370.647	598.59
Progranulin	6041.07	20763	20048.4	32517.2	16549.8	25133.1
Prolactin	877.66	3715.25	1352.03	1995.79	1217.88	1443.61
P-selectin	2027.31	21239.5	3466.03	3946.2	11912	3218.03
RAGE	376.103	1258	657.057	1516.6	453.451	532.223
RANK / TNFRSF11A	607.23	1414.75	710.454	766.651	817.789	606.05
RANTES	207.702	904	202.911	347.548	665.85	434.085
RELM beta	655.903	2966.75	660.794	730.001	1036.76	556.146
RELT / TNFRSF19L	1811.02	5361.75	4945.41	7906.6	1846.93	5867.31
ROBO4	412.802	3893.25	362.302	1015.72	918.205	499.039
S100 A8/A9	3634.79	9117	3726.88	4365.55	5190.63	6748.45
S100A10	150.441	1613.75	415.433	322.617	409.026	443.86
SAA	1580.67	3063	2543.59	2823.77	1790.67	2221.75
SCF	285.526	1094.75	407.156	1408.14	495.466	687.141
SCF R/CD117	494.269	1633	485.117	729.004	509.442	520.39
SDF-1 / CXCL12	1580.93	3951.5	2774.54	3336.12	2008.85	2458.67
sFRP-1	123.372	2038.25	277.4	221.643	340.942	381.609
sFRP-3	104.112	101.5	100.12	132.388	110.143	104.438
sFRP-4	6542.37	2582	7887.88	12529.7	392.465	9324.57
sgp130	3101.75	9699.25	10229.4	9807.65	8393.97	8221.39
SIGIRR	327.17	726	455.481	438.799	479.212	493.058
Siglec-5/CD170	1198.32	3909	1479.11	1536.29	1462.08	1390.88
Siglec-9	1856.83	24508.5	7096.53	8138.72	2549.84	10026.8
SLPI?	1376.09	3674	1746.1	2027.45	1944.19	1632.94
Smad 1	171.784	3649.25	773.73	561.712	484.732	454.987
Smad 4	260.799	974	4706.46	14118.8	304.141	2616.61
Smad 5	158.77	2045.25	76.8924	180.506	331.216	178.522
Smad 7	563.243	1898.5	1066.62	1349.31	535.466	866.116
Smad 8	165.277	2778.75	239.221	445.78	361.709	175.178
Prdx6	247.265	1865.5	365.506	549.496	409.289	387.656
Soggy-1	763.658	5610.5	845.016	1076.05	1216.04	942.515
Sonic Hedgehog	973.182	2865	1303.17	1319.64	1314.35	1345.34
SPARC?	20667.7	25586.8	25969.6	27500.7	25151.4	19000.3
Spinesin	1725.65	4005.5	2165.27	2198.98	1107.73	1920.53
TACI / TNFRSF13B	1564.8	4209	2419.44	2811.8	2075.62	2519.38
Tarc	843.303	1773.75	1084.24	1282.74	962.104	1084.77
TCCR / WSX-1	516.653	4023	746.937	858.649	2591.9	894.409
TECK/ CCL25	649.135	1665.25	575.091	984.305	675.576	877.949
TFPI	905.77	1429.25	1090.91	1274.01	877.986	1029.98
TGF-alpha	503.639	3598.25	265.653	507.61	458.971	425.984
TGF-beta 1	2763.63	6758.75	7637.98	7350.13	4598.12	4573.41
TGF-beta 2	528.675	3113.5	2311.04	1259.8	966.31	1053.13
TGF-beta 3	366.68	833	419.972	640.247	651.611	524.441
TGF-beta 5	2179.31	6881.25	2641.58	3262.32	2707.82	2425.23
TGF-beta RI / ALK-5	408.638	2059.25	253.905	390.431	461.6	437.752
TGF-beta RII	757.932	1314	789.482	970.842	636.671	727.465
Grb2	692.342	2418.5	889.336	1094	1021.25	855.312
TGF-beta RIII	467.981	2137.5	436.792	407.634	481.052	311.514
Thrombopoietin (TPO)	888.071	2544	1634.77	1342.57	1083.81	1311.14
TPX	771.987	1453	875.185	892.556	787.033	879.235
Thrombospondin-1	50893.6	75207.8	335450	399180	23480	117501
Thrombospondin-2	2243.6	33461.2	2886.67	3266.81	3342.66	3054.17
Thrombospondin-4	759.233	1696.5	938.996	1309.17	1012.84	1062.39
Thymopoietin	1307.12	2184.5	1511.68	1906.28	1335.91	1671.27
Tie-1	1080.42	1274	1143.51	1914.26	1104.58	1434.09
Tie-2	537.215	1840	465.626	712.799	570.428	580.71
TIMP-1	2263.9	6539	17277.3	27994.1	5201.41	24808.9
TIMP-2	1494.52	2006	78309.1	184314	19608.6	18481.9
TIMP-3	1442.47	3006.75	14735	21349.1	709.749	5873.23
TIMP-4	502.859	2073.5	609.8	772.385	581.469	345.726
TL1A / TNFSF15	429.72	2228.5	534.509	424.837	329.113	257.751
TLR1	1078.07	3359.5	1455.08	1680.65	1312.77	1129.01
TLR2	393.542	1925	571.621	540.022	595.926	415.437
TLR3	974.484	3903	1203.31	1208.19	1168.46	1137.5
TLR4	403.953	3401.5	461.088	509.106	1436.32	437.045
TMEFF1 / Tomoregulin-1	1711.33	21322	2027.5	2423.37	4876.24	2096.99
TMEFF2	2351.88	6976	18299.1	24723.3	1804.8	6424.23
TNF-alpha	2629.08	7691	7482.33	6824.32	3308.48	6703.69
TNF-beta	2770.67	4903.5	6981.19	6643.81	3442.28	3808.13
TNF RI / TNFRSF1A	870.372	1996.5	893.341	1501.89	1251.52	808.752
TNF RII / TNFRSF1B	337.321	695.5	234.415	509.605	366.441	261.867
TRADD	1049.96	4261.25	1291.15	1453.52	1496.26	1054.67
TRAIL/ TNFSF10	368.034	716.5	472.568	782.607	503.133	530.936
TRAIL R1 / DR4	1974.74	3183	2711.79	2780.39	2150.28	2232.81
TRAIL R2/ DR5	2027.05	3536.75	2295.29	2486.69	2184.45	2155.9
TRAIL R3	839.139	1824.5	949.675	1103.48	588.829	785.858
TRAIL R4	636.902	1776.5	721.401	819.257	617.745	561.548
TRANCE	704.314	3041	1291.15	1548.26	1235.36	1577.89
TREM-1	1134.82	2077.5	1479.38	1615.08	1161.62	1126.18
TROY / TNFRSF19	656.944	2073.5	1223.54	2184.02	2499.63	1296.98
TSG-6	463.817	926.25	520.359	967.601	440.307	574.667
TSLP R	362.568	1113.25	249.9	557.474	498.402	316.401
TWEAK / TNFSF12	1196.76	3791.25	3430.79	4354.08	2629.49	1746.38
TWEAK R / TNFRSF12	764.699	3870.5	3825.67	8722.12	3689.64	3632.94
Ubiquitin+1	3023.4	5426.5	5178.76	5634.57	3392.86	5308.85
uPA	753.141	29557.2	4298.53	17965.6	4710.23	6331.46
uPAR	669.697	1166.75	2411.43	1069.07	1213.67	679.619
Vasorin	1440.9	1617.5	1325.33	2132.16	1342.74	1397.57
VCAM-1 (CD106)	939.086	1277.5	1216.13	1312.91	800.702	1133.38
VE-Cadherin	1116.6	1280.5	1016.69	1409.64	969.202	1067.53
VEGF	728	1310.75	3268.86	8341.16	12475.5	4221.36
VEGF R2(KDR)	620.244	750.25	673.877	1125.92	733.408	780.713
VEGF R3	510.667	733.75	388.2	878.416	1022.37	745.791
VEGF-B	302.965	566	378.588	2065.35	2631.94	1868.69
VEGF-C	954.182	1091	7408.37	39168.5	37273.1	6424.08
VEGF-D	820.919	430	864.506	1137.88	2144.86	1897.76
VEGI/ TNFSF15	925.551	950.75	1170.47	1254.07	3009.68	1985.47
WIF-1	767.302	890.25	872.516	1160.82	869.311	778.398
WISP-1 / CCN4	1507.01	4316.25	1660.66	2963.14	2031.46	1726.32
XEDAR	1661.1	3342.5	4769.73	4919.78	1896.34	4960.55

## Sheet: Supplemental Table 2
proteinID	HEFCM	AECM	AMSCM	BMSCM	UMSCM	ADSCM
	Normalized flurescent signal intensity
Activin A	1456	20269.5	53017.3	65584.2	78220.5	26601.2
CNTF	1056.21	22753.5	3098.26	3686.64	3500.68	3859.7
GDF-15	60.4941	8499.75	1489.79	1049.88	3526.14	1468.17
FGF-11	484.789	4785.75	6273.68	6313.47	1108.79	6853.81
FGF-10 / KGF-2	163.036	2578	1013.75	1857.91	664.536	1601.04
BMP-4	626.751	2066.25	965.694	952.891	637.723	1158.85
BMP-15	867.77	3573.75	1301.56	1558.48	1752.55	999.364
BDNF	6.24669	6376	1490.59	1546.46	923.988	974.986
OSM	257.31	26827.8	683.488	1477.46	2703.62	1756.53
VEGF	728	1310.75	3268.86	8341.16	12475.5	4221.36
beta-NGF	5.20558	1223.25	260.046	430.821	240	309.456
GDNF	142.373	896	621.547	456.251	696.343	555.179
PDGF-AA	473.187	6119.5	1096.25	2148.87	915.314	473.058
PDGF-AB	385.993	4273.25	1320.25	1334.6	921.097	1192.03
PDGF-BB	249.868	2189.25	290.483	366.995	504.185	466.497
PDGF-C	441.433	2680	512.616	988.793	749.968	705.343
PDGF-D	179.592	2093	302.764	384.447	282.322	315.757
FGF Basic	109.785	1245	449.099	532.34	695.357	607.655
IGF-I	92.9195	511.5	245.896	303.17	427.164	406.047
IGF-II	302.444	10169	542.519	646.231	1189.22	882.576
HGF	141.486	426.5	628.489	575.923	572.005	597.173
NT-3	377.404	4152	466.961	572.682	815.686	1001.1
NT-4	312.074	2258.25	535.577	862.14	842.236	908.045
FGF-9	52.0558	3630.25	307.863	330.907	391.676	432.991
HB-EGF	210.773	6238.5	660.26	1306.92	618.533	633.574
SCF	285.526	1094.75	407.156	1408.14	495.466	687.141
Lefty - A	137.687	10906.8	421.84	444.058	612.75	624.118

## Sheet: Supplemental Table 3
proteinID	HEFCM	AECM	AMSCM	BMSCM	UMSCM	ADSCM
	Normalized flurescent signal intensity
IL-1 ra	127.537	10948.5	267.668	460.287	747.865	420.709
IL-13	1170.71	8401	6500.88	10065.4	5195.89	7038
IL-10	633.404	5318.75	2423.98	2715.57	2235.97	2071.78
IL-2	3438.28	3063	5164.61	5196.77	3452.8	5134.44
IL-11	575.993	2784.5	1733.02	1468.48	1631.11	1409.4
IL-4	95.7826	1835.5	717.129	598.362	433.998	295.822
IL-5	3303.26	2831.75	4019.23	4271.56	3190.98	3672.83
IL-7	3036.41	2924.5	3818.19	4182.05	3838.43	3357.2
CCL2/MCP-1	2478.37	2047.75	6154.6	5163.86	5519.22	3307.55
TGF-beta 1	2763.63	6758.75	7637.98	7350.13	4598.12	4573.41
TGF-beta 2	528.675	3113.5	2311.04	1259.8	966.31	1053.13
TGF-beta 3	366.68	833	419.972	640.247	651.611	524.441
TGF-beta 5	2179.31	6881.25	2641.58	3262.32	2707.82	2425.23
TNF RI / TNFRSF1A	870.372	1996.5	893.341	1501.89	1251.52	808.752
TNF RII / TNFRSF1B	337.321	695.5	234.415	509.605	366.441	261.867
GM-CSF	1053.34	3600	3130.16	3157.36	2373.72	2597.83
TSG-6	463.817	926.25	520.359	967.601	440.307	574.667

## Sheet: Supplemental Table 4
Primer name	Primer sequence		Species
GAPDH	forward	GCTTGTCATCAACGGGAA	mouse
	reverse	CCAGTAGACTCCACGACATA
Tbx21	forward	GTGATTGGTTGGAGAGGAAG	mouse
	reverse	TGTAGTTCGGGCAGAGAA
GATA3	forward	ACTGAGAGAGCGAGACATAG	mouse
	reverse	TCTTCCGATCACCTGAGTAG
RorC	forward	CTGGAGGAAGGACAACTTTC	mouse
	reverse	CTAGGGATACCACCCTTCATA
Foxp3	forward	TCACCTATGCCACCCTTAT	mouse
	reverse	GGCGAACATGCGAGTAAA
TNF-α	forward	GTCTACTCCCAGGTTCTCTT	mouse
	reverse	GGTTGACTTTCTCCTGGTATG
IL-1β	forward	GGGCAACCACTTACCTATTT	mouse
	reverse	TCTAGAGAGTGCTGCCTAAT
IL-4	forward	GTCATCCTGCTCTTCTTTCTC	mouse
	reverse	TTCTCCTGTGACCTCGTT
IL-6	forward	GGATGTCTGTAGCTCATTCTG	mouse
	reverse	CAACTGGATGGAAGTCTCTTG
IL-13	forward	AGCTGAGCAACATCACAC	mouse
	reverse	ATCCAGGGCTACACAGAA
IL-33	forward	AATGCTCACGGTGGAATAG	mouse
	reverse	GAAAGAAAGCTGAGGGAGTAG
IL-10	forward	TGAATTCCCTGGGTGAGA	mouse
	reverse	CCACTGCCTTGCTCTTATT
TGFβ	forward	GAACCAAGGAGACGGAATAC	mouse
	reverse	GGCTGATCCCGTTGATTT
Tnfsf13	forward	CTGGCTAGACAAAGGACAAG	mouse
	reverse	GAGTCAAAGCCCAGATAGTG
Tnfsf13b	forward	CCCAACAATTCCTGCTACTC	mouse
	reverse	GTCTCCGTTGCGTGAAAT
CXCL13	forward	GTGAATCCTCGTGCCAAA	mouse
	reverse	AGGCAGCTCTTCTCTTACT
GAPDH	forward	ACATCGCTCAGACACCATG	human
	reverse	TGTAGTTGAGGTCAATGAAGGG
TNF-α	forward	AGGGAGAGAAGCAACTACA	human
	reverse	CAGTATGTGAGAGGAAGAGAAC
IL-1β	forward	GGCAGAAAGGGAACAGAAA	human
	reverse	AGGAGATCCTCTTAGCACTAC
IL-4	forward	AGGAAGCCAACCAGAGTA	human
	reverse	TCAGCTCGAACACTTTGAATA
IL-6	forward	CCTAGAGTACCTCCAGAACAGA	human
	reverse	CAGGAACTGGATCAGGACTTT
IL-13	forward	CTAGAGCACACTGTAGCATTAC	human
	reverse	CAGTTGCCTGTGTGTGAA
IL-33	forward	GTGACGGTGTTGATGGTAAG	human
	reverse	CACAGAGTGTTCCTTGTTGT

## Sheet: Supplemental Table 5
Antibody name	Manufacturer	Catalog #	Resource	Dilution
Human IL-1ra	R&D	AF-280-NA	Goat
IL-10	R&D	AF-7-NA	Goat
GAPDH	Proteintech	HRP-60004	Mouse	1:10000
NF-κB	CST	8242	Rabbit	1:1000
Lamin B	Proteintech	66095-1-lg	Mouse	1:5000
Phospho-P38	CST	9216	Mouse	1:1000
P38	CST	8690	Rabbit	1:1000
Phospho-JNK	CST	9255	Mouse	1:1000
JNK	CST	9252	Rabbit	1:1000
Phospho-Erk1/2	CST	9101	Rabbit	1:1000
Erk1/2	CST	4695	Rabbit	1:1000
Phospho-VE-Cadherin	Invitrogen	44-1145G	Rabbit	1:1000
VE-Cadherin	abcam	ab33168	Rabbit	1:1000
